# Supplementary material for: Phase transition and rapid temperature response of lead-free perovskite Cs–Cu–I nanocrystals enabled by their size
Source: Royal Society of Chemistry journal article supplement (doi:10.1039/d3tc02362a), 2023-01-01
Supplement: d3tc02362a2.pdf [file d3tc02362a2.pdf]

## Supporting Information

### **Phase Transition and Rapid Temperature Response of Lead-Free Perovskite Cs-Cu-I Nanocrystals Enabled by Their Size**

Jie Chen, Yu Li, Shuaibing Wang, Ouyang Lin, Wentao Niu, Zhe Yin,\* Feng Teng,\*  
Aiwei Tang\*

*Key Laboratory of Luminescence and Optical Information, Ministry of Education,  
School of Physical Science and Engineering, Beijing Jiaotong University, Beijing,  
100044, China*

**Corresponding to:** Aiwei Tang (Email: [awtang@bjtu.edu.cn](mailto:awtang@bjtu.edu.cn))

Feng Teng (E-mail: [fteng@bjtu.edu.cn](mailto:fteng@bjtu.edu.cn))

Zhe Yin (E-mail: [zheyin@bjtu.edu.cn](mailto:zheyin@bjtu.edu.cn))

Experimental section and characterization; TEM images; Size distribution of  $\text{Cs}_3\text{Cu}_2\text{I}_5$  NCs; EDS mapping of  $\text{Cs}_3\text{Cu}_2\text{I}_5$  NCs; XRD patterns of  $\text{Cs}_3\text{Cu}_2\text{I}_5$  NCs,  $\text{Cs}_3\text{Cu}_2\text{Br}_5$  and  $\text{Cs}_3\text{Cu}_2\text{Cl}_5$ ; XPS survey spectra; Normalized PL spectra of  $\text{Cs}_3\text{Cu}_2\text{I}_5$  NCs with various reaction time; PL spectra under different volumes of Cs-oleate; PL spectra under different reaction temperatures; The images of colloidal solution of  $\text{Cs}_3\text{Cu}_2\text{I}_5$  NCs dispersed in n-hexane; Normalized PL spectra of  $\text{Cs}_3\text{Cu}_2\text{Br}_5$  NCs and  $\text{Cs}_3\text{Cu}_2\text{Cl}_5$  NCs; EDS atomic ratio of  $\text{Cs}_3\text{Cu}_2\text{I}_5$  NCs; Fitting parameters of TRPL spectra (PDF)

Supporting Video: demonstration of paper chromatism (MP4)

## 1. Synthesis of $\text{Cs}_3\text{Cu}_2\text{Br}_5$ and $\text{Cs}_3\text{Cu}_2\text{Cl}_5$ NCs

0.4 mmol of  $\text{CuX}$  ( $X = \text{Br}$  or  $\text{Cl}$ ) and 10 mL of ODE were introduced into a 25 mL three-necked flask and heated to 120 °C for 30 minutes under vacuum. After that, 1 mL of OA and 1 mL of OAm were swiftly injected into the reaction flask. The transparent solution was obtained. Then, the temperature was increased to 150 °C under nitrogen, and  $x$  mL ( $x = 4.0, 0.8, 0.4$ ) of Cs-oleate precursor was immediately injected into the mixture. NCs were grown for 10 s at 150 °C, and then the reaction solution was cooled to room temperature in an ice bath. Finally, the solution was centrifuged at 10,000 rpm for 5 min. The supernatant was discarded, and the solids were dispersed in 5 mL of hexane followed by centrifuging at 10,000 rpm for 5 min. Finally, the supernatant was thrown away and precipitate was retained for the next characterization.

## 2. Experimental data

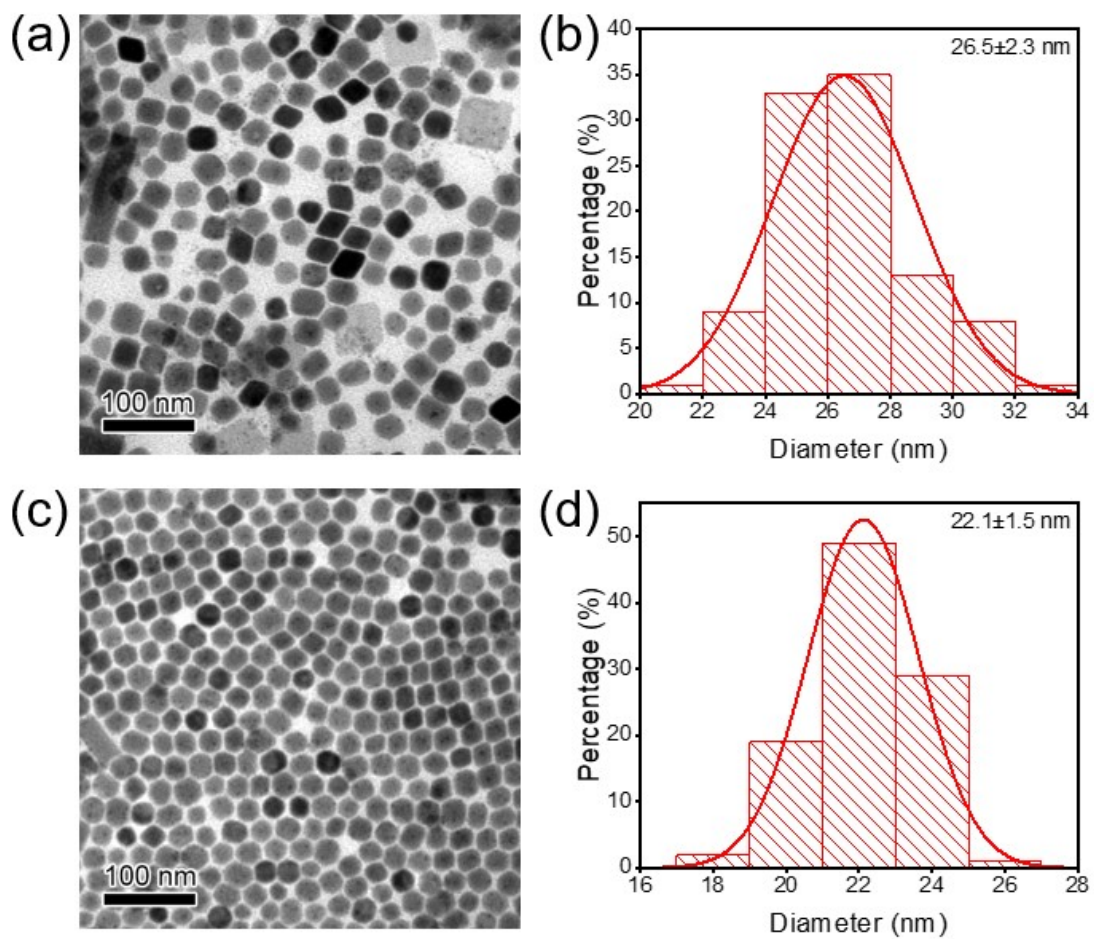

**Fig. S1** TEM images and size distribution of  $\text{Cs}_3\text{Cu}_2\text{I}_5$  NCs with (a) (b) 0.5 mL and (c) (d) 1.0 mL OA.

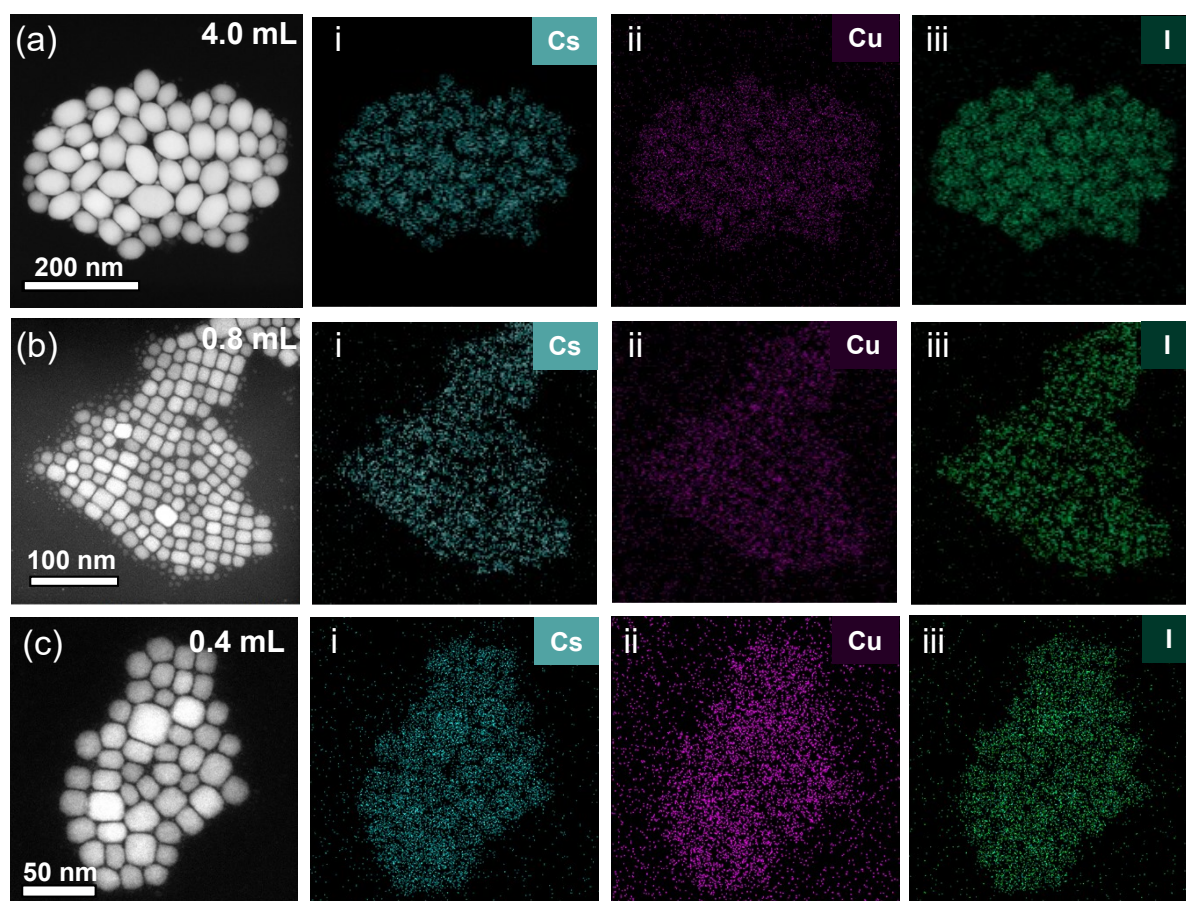

**Fig. S2** TEM images and corresponding EDS elemental mapping images of (a)  $\text{Cs}_3\text{Cu}_2\text{I}_5-4.0$ , (b)  $\text{Cs}_3\text{Cu}_2\text{I}_5-0.8$  and (c)  $\text{Cs}_3\text{Cu}_2\text{I}_5-0.4$  at 70 °C.

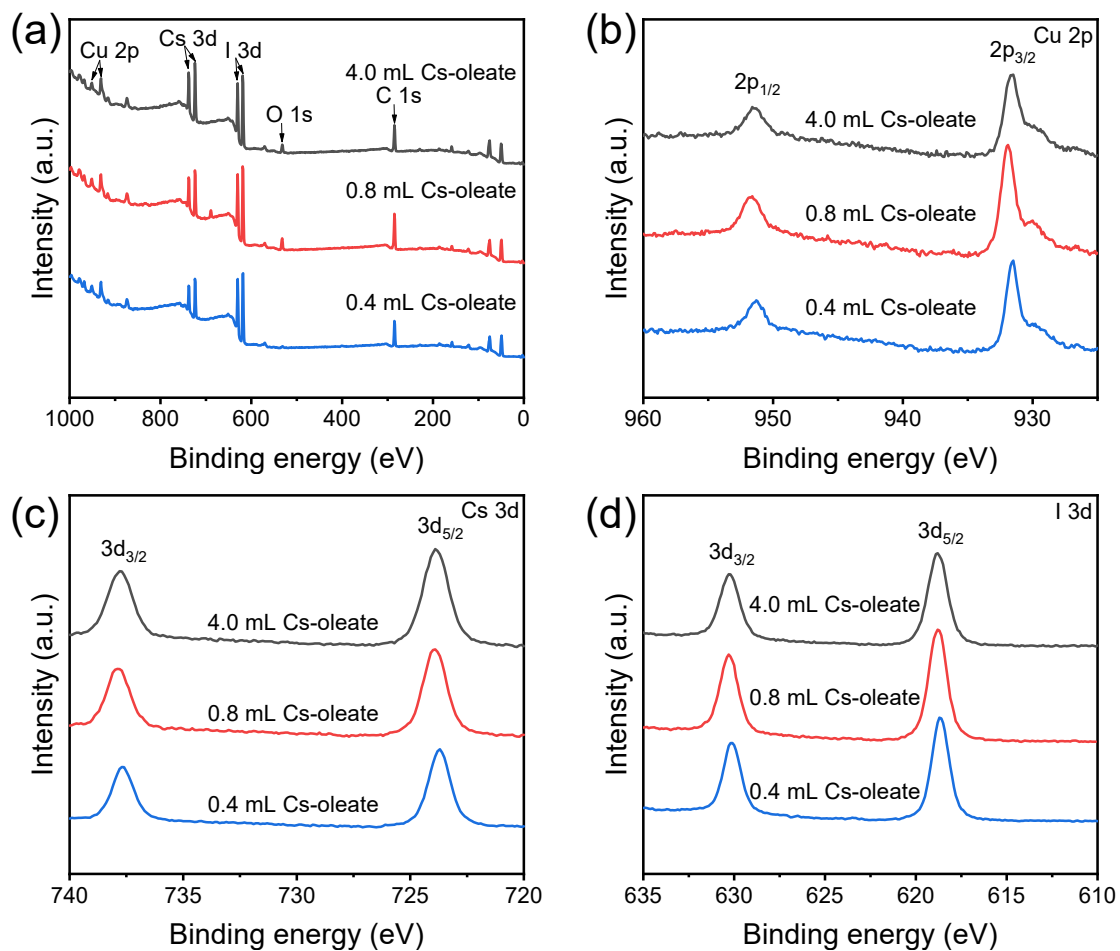

**Fig. S3** XPS results of  $\text{Cs}_3\text{Cu}_2\text{I}_5$  at  $70^\circ\text{C}$ . (a) XPS survey spectra and curves of (b) Cu 2p, (c) Cs 3d, and (d) I 3d.

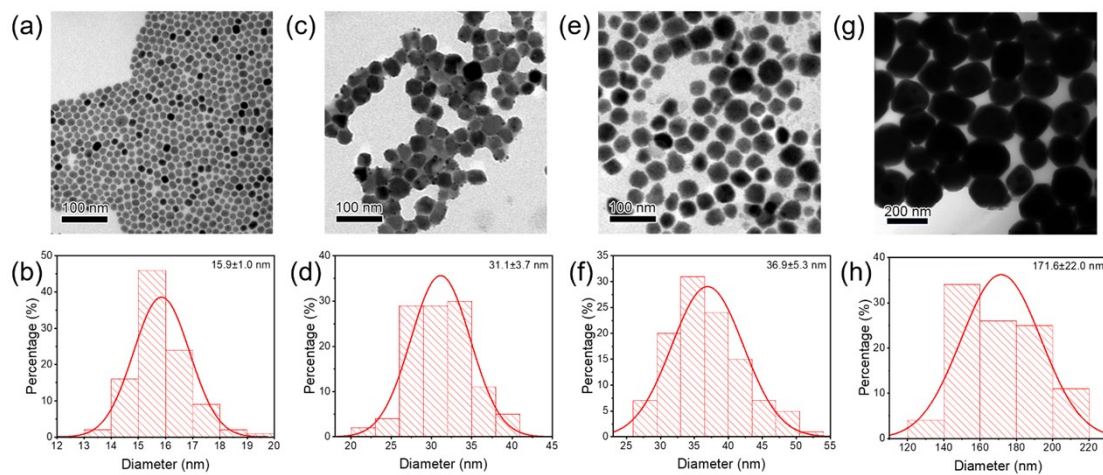

**Fig. S4** TEM images and size distribution histograms of (a, b)  $\text{Cs}_3\text{Cu}_2\text{I}_5\text{-2.0}$ , (c, d)  $\text{Cs}_3\text{Cu}_2\text{I}_5\text{-6.0}$ , (e, f)  $\text{Cs}_3\text{Cu}_2\text{I}_5\text{-8.0}$  and (g, h)  $\text{Cs}_3\text{Cu}_2\text{I}_5\text{-12}$  at 70 °C.

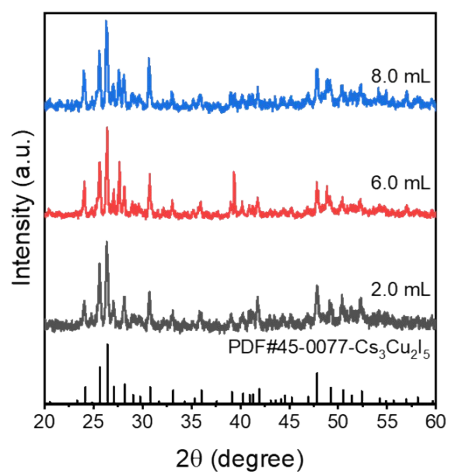

**Fig. S5** XRD of  $\text{Cs}_3\text{Cu}_2\text{I}_5$ -2.0,  $\text{Cs}_3\text{Cu}_2\text{I}_5$ -6.0 and  $\text{Cs}_3\text{Cu}_2\text{I}_5$ -8.0 at  $70^\circ\text{C}$ .



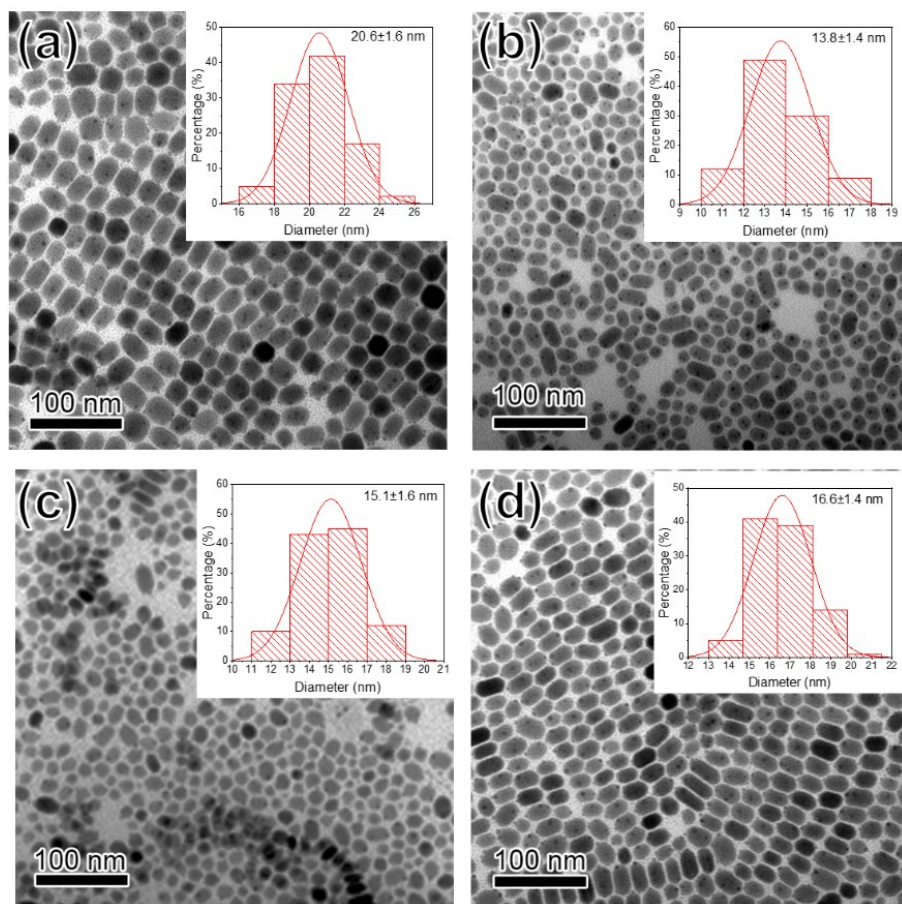

**Fig. S6** TEM images and the corresponding size distribution histograms of  $\text{Cs}_3\text{Cu}_2\text{I}_{5-0.8}$  at  $70^\circ\text{C}$  under various reaction time: (a) 10 min, (b) 30 min, (c) 60 min, (d) 120 min.

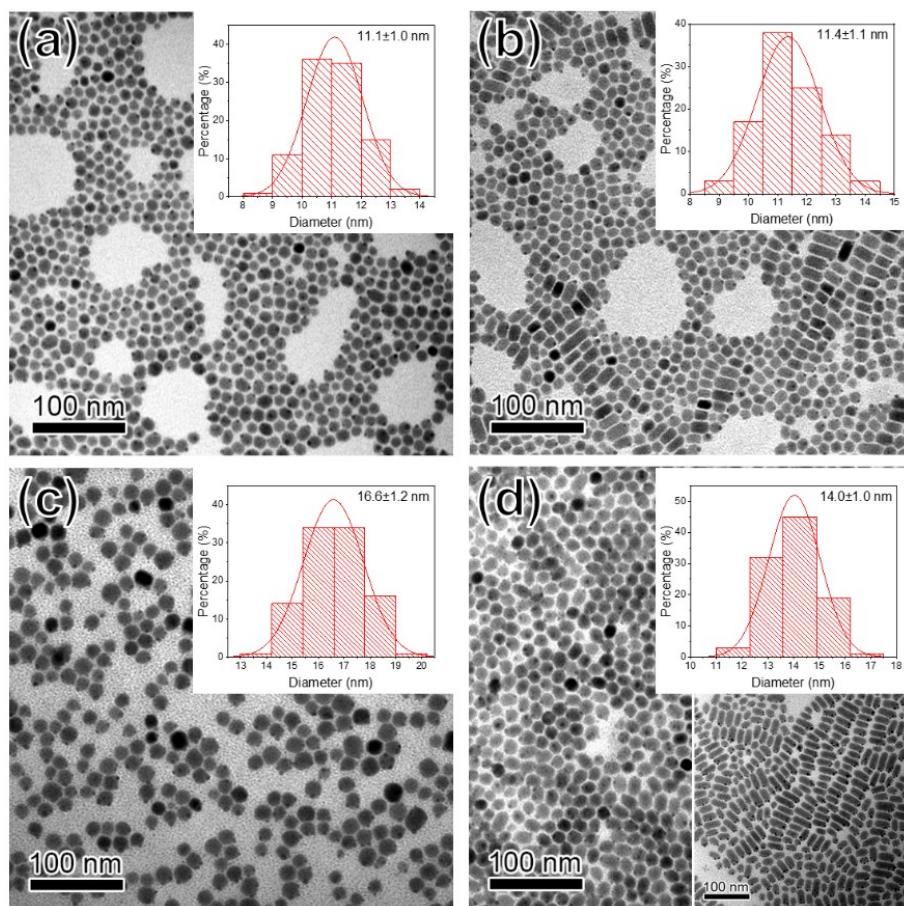

**Fig. S7** TEM images and the corresponding size distribution histograms of  $\text{Cs}_3\text{Cu}_2\text{I}_5\text{-}0.4$  at  $70\text{ }^\circ\text{C}$  under various reaction time: (a) 10 min, (b) 30 min, (c) 60 min, (d) 120 min.

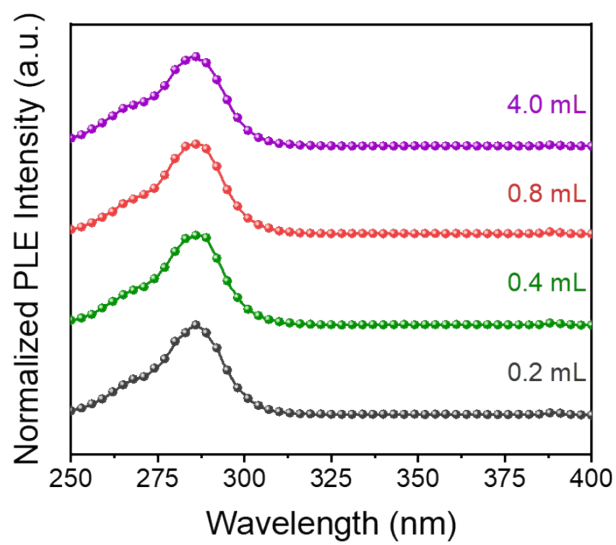

**Fig. S8** PLE spectra of Cs<sub>3</sub>Cu<sub>2</sub>I<sub>5</sub> NCs.

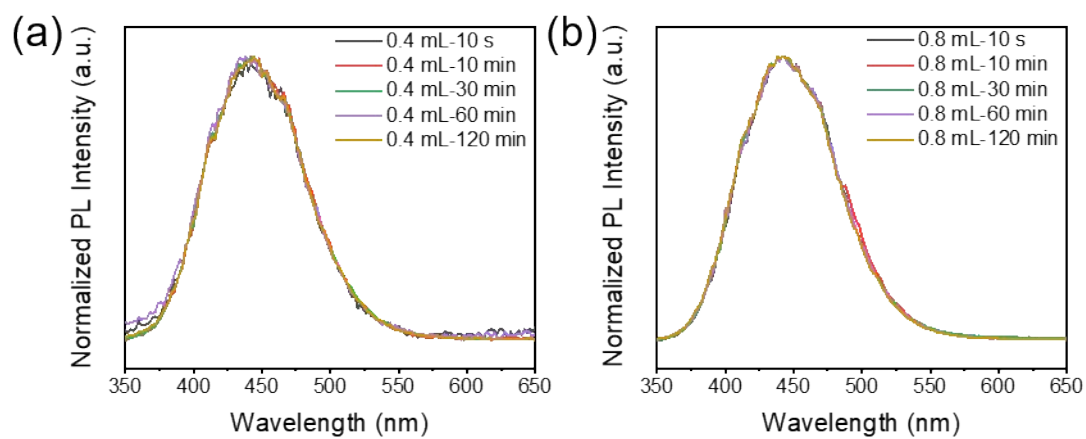

**Fig. S9** Normalized PL spectra of (a)  $\text{Cs}_3\text{Cu}_2\text{I}_5-0.4$  and (b)  $\text{Cs}_3\text{Cu}_2\text{I}_5-0.8$  under various reaction time.

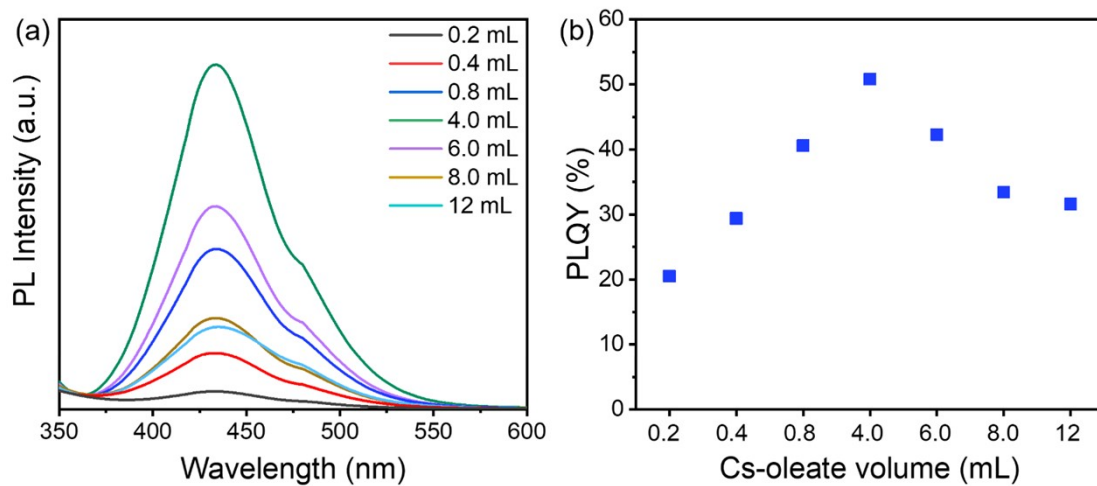

**Fig. S10** (a) PL spectra with excitation wavelength of 290 nm and (b) PLQY of  $\text{Cs}_3\text{Cu}_2\text{I}_5$  NCs with different Cs-oleate volumes.

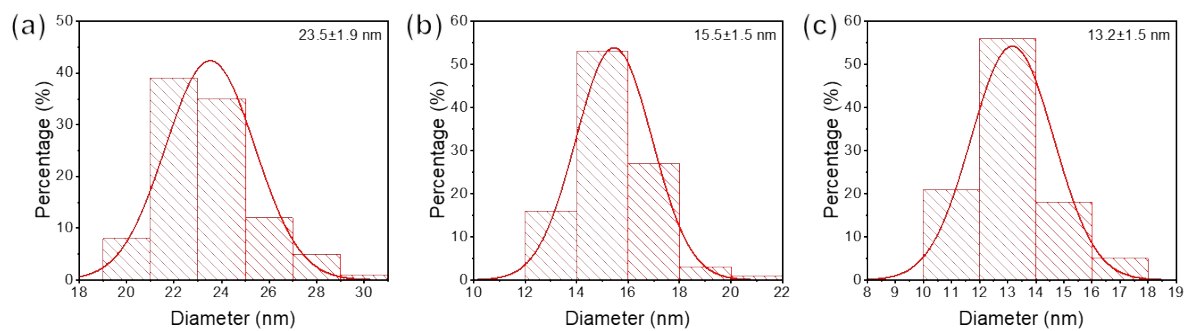

**Fig. S11** The size distribution histograms of (a)  $\text{Cs}_3\text{Cu}_2\text{I}_{5-4.0}$ , (b)  $\text{Cs}_3\text{Cu}_2\text{I}_{5-0.8}$  and (c)  $\text{Cs}_3\text{Cu}_2\text{I}_{5-0.4}$  at 100 °C.

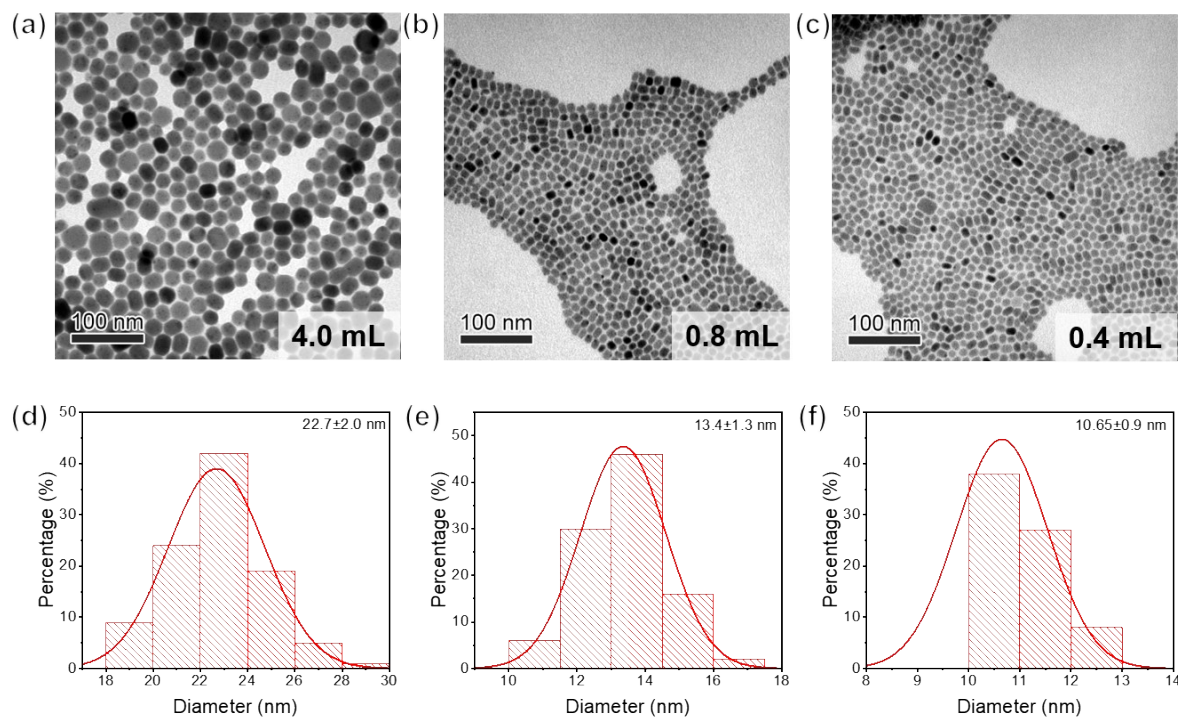

**Fig. S12** TEM images and the corresponding size distribution histograms of (a, d)  $\text{Cs}_3\text{Cu}_2\text{I}_5$ -4.0, (b, e)  $\text{Cs}_3\text{Cu}_2\text{I}_5$ -0.8 and (c, f)  $\text{Cs}_3\text{Cu}_2\text{I}_5$ -0.4 at 80 °C.

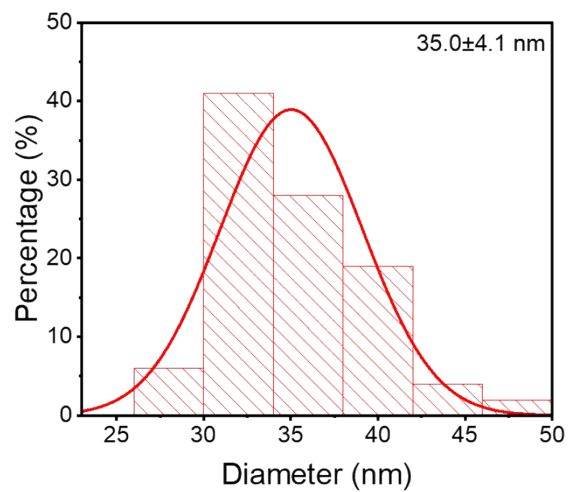

**Fig. S13** The size distribution histograms of  $\text{Cs}_3\text{Cu}_2\text{I}_5\text{-4.0}$  at 120 °C.



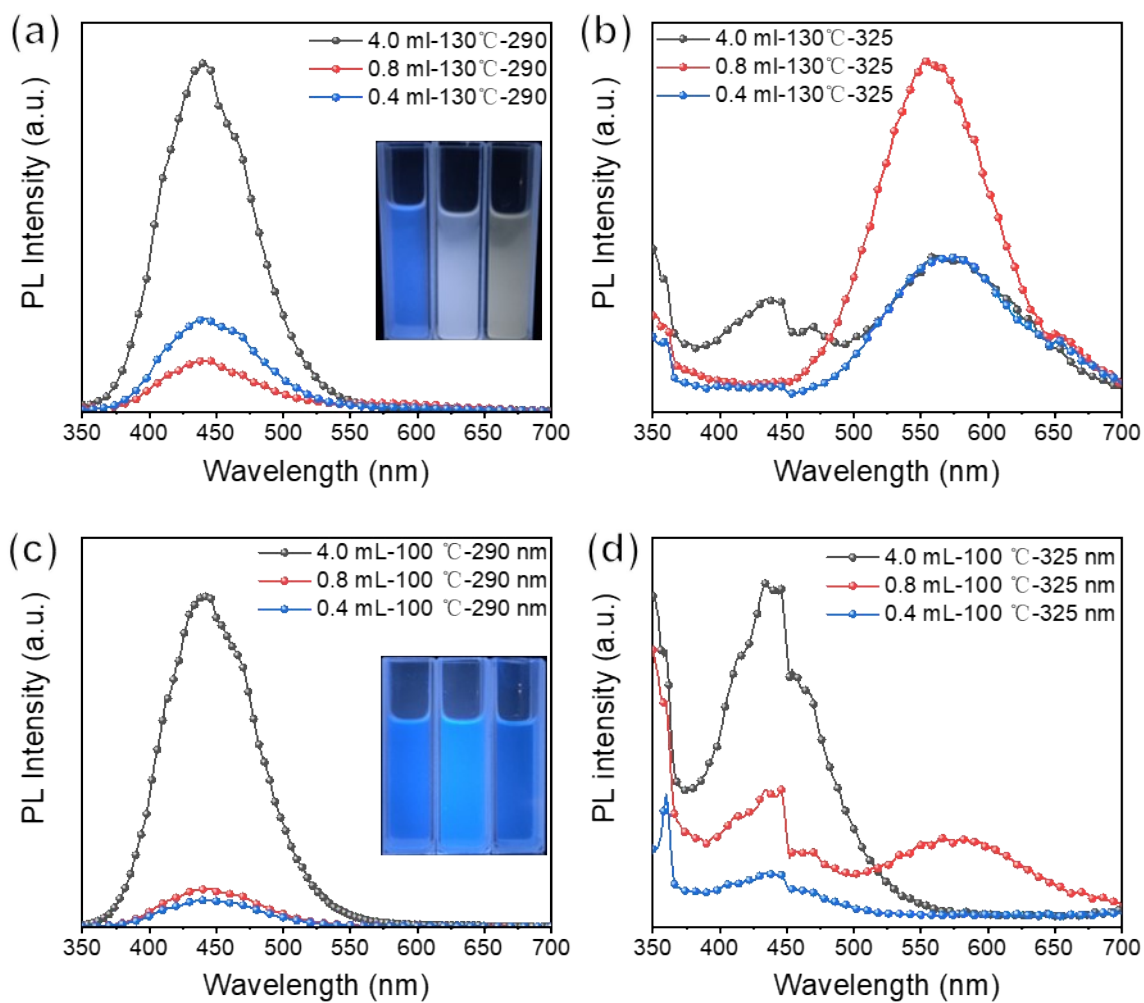

**Fig. S14** PL spectra of  $\text{Cs}_3\text{Cu}_2\text{I}_5$  NCs with various Cs-oleate volumes and reaction temperatures of (a, b) 130 °C, (c, d) 100 °C (excitation wavelengths are 290 nm and 325 nm). Inset: colloidal solution of NCs in n-hexane under UV light ( $\lambda = 295$  nm).

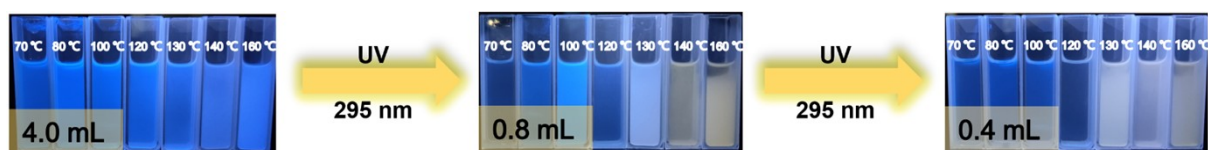

**Fig. S15** The images of colloidal solution of  $\text{Cs}_3\text{Cu}_2\text{I}_5$  NCs dispersed in n-hexane synthesized at different reaction temperatures under UV light ( $\lambda = 295$  nm).

The images show the colloid solution of  $\text{Cs}_3\text{Cu}_2\text{I}_5$  NCs dispersed in n-hexane synthesized at different reaction temperatures under UV irradiation ( $\lambda = 295$  nm). When 4.0 mL of Cs-oleate was injected and the reaction temperature was raised, the synthesized samples showed blue light under 295 nm UV lamp. It further indicates that the content of yellow phase  $\text{CsCu}_2\text{I}_3$  was less. When 0.8 mL and 0.4 mL of Cs-oleate were injected and the reaction temperature was increased, the synthesized samples were converted from blue to yellow under 295 nm UV lamp, indicating that the yellow phase  $\text{CsCu}_2\text{I}_3$  was dominant at a higher temperature.

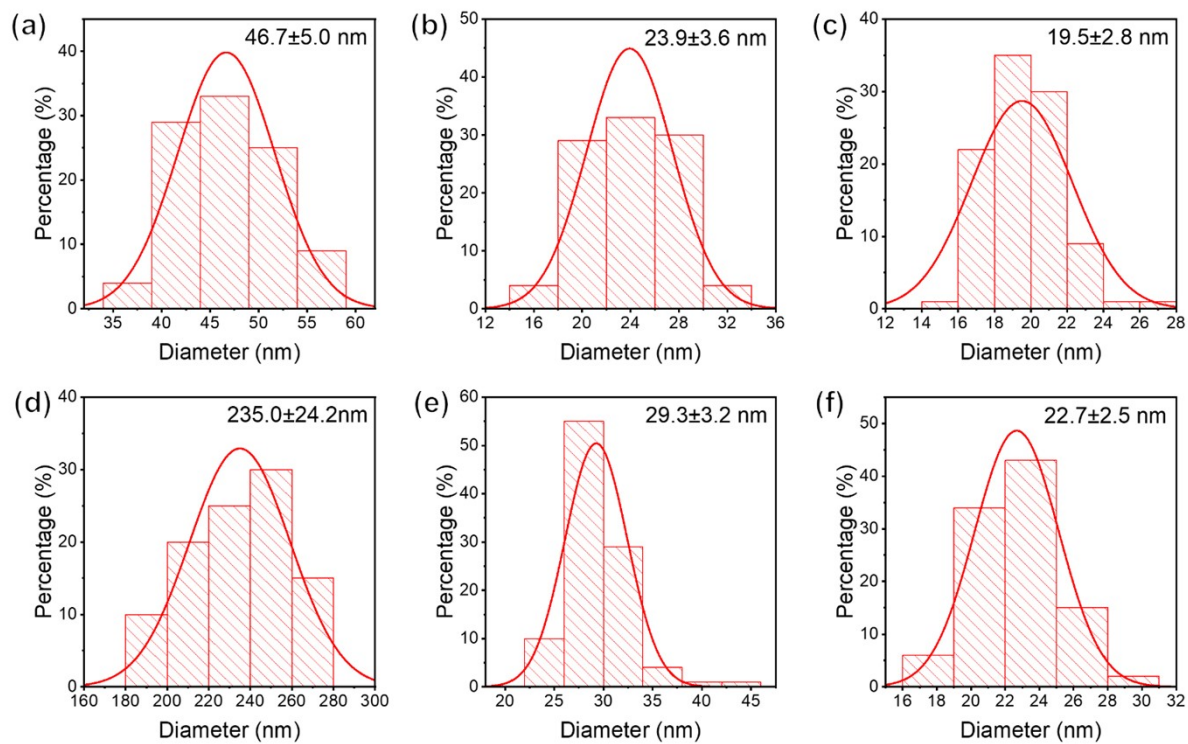

**Fig. S16** The size distribution histograms of (a-c)  $\text{Cs}_3\text{Cu}_2\text{Br}_5$  NCs and (d-f)  $\text{Cs}_3\text{Cu}_2\text{Cl}_5$  NCs with various Cs-oleate volumes at 150 °C.

**Table S1.** EDS measured the atomic ratio of Cs<sub>3</sub>Cu<sub>2</sub>I<sub>5</sub> NCs.

| Sample                                              | Atomic ratio (%) |      |      |
|-----------------------------------------------------|------------------|------|------|
|                                                     | Cs               | Cu   | I    |
| Cs <sub>3</sub> Cu <sub>2</sub> I <sub>5</sub> -4.0 | 25.3             | 25.6 | 49.1 |
| Cs <sub>3</sub> Cu <sub>2</sub> I <sub>5</sub> -0.8 | 23.5             | 29.3 | 47.3 |
| Cs <sub>3</sub> Cu <sub>2</sub> I <sub>5</sub> -0.4 | 23.6             | 30.3 | 46.2 |

**Table S2.** Fitting results of TRPL spectra

| Sample                                              | $\tau$ (ns) |
|-----------------------------------------------------|-------------|
| Cs <sub>3</sub> Cu <sub>2</sub> I <sub>5</sub> -4.0 | 1303.2      |
| Cs <sub>3</sub> Cu <sub>2</sub> I <sub>5</sub> -0.8 | 1106.8      |
| Cs <sub>3</sub> Cu <sub>2</sub> I <sub>5</sub> -0.4 | 1113.5      |
| Cs <sub>3</sub> Cu <sub>2</sub> I <sub>5</sub> -0.2 | 952.7       |

**Table S3.** Performance comparison of materials.

| Materials                                                                                                                                           | Transition temperature | Transition time     | Year      | Ref |
|-----------------------------------------------------------------------------------------------------------------------------------------------------|------------------------|---------------------|-----------|-----|
| CsPbI <sub>3-x</sub> Br <sub>x</sub>                                                                                                                | 340 °C                 |                     | 2022      | 1   |
| (CH <sub>2</sub> ) <sub>2</sub> (NH <sub>3</sub> ) <sub>2</sub> CuCl <sub>4</sub>                                                                   | 230 °C                 |                     | 2022      | 2   |
| (1,6-HDA)CuCl <sub>4</sub>                                                                                                                          | 1400 °C                |                     | 2021      | 3   |
| Cs <sub>2</sub> AgBiBr <sub>6</sub>                                                                                                                 | 450 °C                 | 24 h                | 2022      | 4   |
| (C <sub>6</sub> H <sub>4</sub> (CH <sub>2</sub> NH <sub>3</sub> ) <sub>2</sub> )(CH <sub>3</sub> NH <sub>3</sub> )[Pb <sub>2</sub> I <sub>7</sub> ] | 60 °C                  | A couple of hours   | 2021      | 5   |
| CsPbIBr <sub>2</sub>                                                                                                                                | 240 °C                 | 17 min              | 2023      | 6   |
| (C(NH <sub>2</sub> ) <sub>3</sub> )PbI <sub>3</sub>                                                                                                 | 200 °C                 | 5 min               | 2021      | 7   |
| MA <sub>4</sub> PbI <sub>6</sub> ·H <sub>2</sub> O                                                                                                  | 55.7 °C                | 4 min               | 2022      | 8   |
| (C <sub>6</sub> H <sub>4</sub> (CH <sub>2</sub> NH <sub>3</sub> ) <sub>2</sub> )(CH <sub>3</sub> NH <sub>3</sub> )[Pb <sub>2</sub> I <sub>7</sub> ] | 100 °C                 | A couple of minutes | 2021      | 5   |
| (CH <sub>3</sub> NH <sub>3</sub> ) <sub>2</sub> CuCl <sub>x</sub> Br <sub>4-x</sub>                                                                 | 70 °C                  | 1 min               | 2021      | 9   |
| MAPbBr <sub>2.7</sub> I <sub>0.3</sub>                                                                                                              | 90 °C                  | 1 min               | 2017      | 10  |
| MAPbBr <sub>2.4</sub> I <sub>0.6</sub>                                                                                                              | 120 °C                 | 30 s                | 2017      | 10  |
| Cs <sub>3</sub> Cu <sub>2</sub> I <sub>5</sub>                                                                                                      | > 120 °C               | 3 min               | 2022      | 11  |
| Cs <sub>3</sub> Cu <sub>2</sub> I <sub>5</sub>                                                                                                      | 130 °C                 | 15 s                | This work |     |

## References

1. L. Yuan, M. Yuan, H. Xu, C. Hou and X. Meng, *Applied Surface Science*, 2022, **573**, 151484.
2. S. Dutta, D. Vishnu S. K, S. Som, R. Chaurasiya, D. K. Patel, K. Moovendaran, C.-C. Lin, C.-W. Chen and R. Sankar, *ACS Applied Electronic Materials*, 2022, **4**, 521-530.
3. H. Fu, C. Jiang, C. Luo, H. Lin and H. Peng, *European Journal of Inorganic Chemistry*, 2021, **2021**, 4984-4989.
4. Y. Zhang, Y. Song, Y. Lu, Z. Zhang, Y. Wang, Y. Yang, Q. Dong, Y. Yu, P. Qin and F. Huang, *Small*, 2022, **18**, 2201943.
5. Y. Zhang, Z. Wang, S. Hu, P. Yan, H. Li and C. Sheng, *ACS Applied Materials & Interfaces*, 2021, **13**, 12042-12048.
6. R. Ge, Y. Zhao, C. Jiang, J. Zheng, L. Chen, Y. Zheng, G. Xu and X. Xiao, *Science China Materials*, 2023, **66**, 3261-3270.
7. Y. Kim, P. Nandi, D. Lee and H. Shin, *Applied Surface Science*, 2021, **542**, 148575.
8. Y. Du, S. Liu, Z. Zhou, H. H. Lee, T. C. Ho, S.-P. Feng and C. Y. Tso, *Materials Today Physics*, 2022, **23**, 100624.
9. A. Elattar, H. Suzuki, R. Mishima, K. Nakao, H. Ota, T. Nishikawa, H. Inoue, A. K. K. Kyaw and Y. Hayashi, *Journal of Materials Chemistry C*, 2021, **9**, 3264-3270.
10. M. De Bastiani, M. I. Saidaminov, I. Dursun, L. Sinatra, W. Peng, U. Buttner, O. F. Mohammed and O. M. Bakr, *Chemistry Of Materials*, 2017, **29**, 3367-3370.
11. W. Cui, J. Zhao, L. Wang, P. Lv, X. Li, Z. Yin, C. Yang and A. Tang, *Journal of Physical Chemistry Letters*, 2022, **13**, 4856-4863.
